# Supplementary material for: A Guide to Cannabis Virology: From the Virome Investigation to the Development of Viral Biotechnological Tools
Source: MDPI journal article supplement (doi:10.3390/v15071532), 2023-07-12
Supplement: s1 [file s1]

| Accession | Geo_Location        | Host            | Length | Nuc_Completeness | Organism_Name        | Release_Date | Submitters                                                                                                   |
|-----------|---------------------|-----------------|--------|------------------|----------------------|--------------|--------------------------------------------------------------------------------------------------------------|
| OQ628293  | USA                 | Cannabis sativa | 2932   | complete         | Beet curly top virus | 23/04/23     | Schoener,J.L., Wang,S.                                                                                       |
| OQ068391  | USA: WA             | Cannabis sativa | 2929   | complete         | Beet curly top virus | 28/02/23     | Jarugula,S., Wagstaff,C., Mitra,A., Crowder,D., Gang,D., Rayapati,N., Crowder,D.W., Gang,D.R., Rayapati,N.A. |
| OQ068392  | USA: WA             | Cannabis sativa | 1715   | partial          | Beet curly top virus | 28/02/23     | Jarugula,S., Wagstaff,C., Mitra,A., Crowder,D., Gang,D., Rayapati,N., Crowder,D.W., Gang,D.R., Rayapati,N.A. |
| OL624873  | USA: Fresno         | Cannabis sativa | 2931   | complete         | Beet curly top virus | 02/05/22     | Melgarejo,T.A., Chen,L.F., Rojas,M.J., Schilder,A., Gilbertson,R., Gilbertson,R.L.                           |
| OL624874  | USA: San Bernardino | Cannabis sativa | 2930   | complete         | Beet curly top virus | 02/05/22     | Melgarejo,T.A., Chen,L.F., Rojas,M.J., Schilder,A., Gilbertson,R., Gilbertson,R.L.                           |
| OL624875  | USA: San Bernardino | Cannabis sativa | 2930   | complete         | Beet curly top virus | 02/05/22     | Melgarejo,T.A., Chen,L.F., Rojas,M.J., Schilder,A., Gilbertson,R., Gilbertson,R.L.                           |
| MW604759  | USA: Mesa, CO       | Cannabis sativa | 469    | partial          | Beet curly top virus | 16/06/21     | Chiginsky,J., Albrecht,T., Nachappa,P.                                                                       |
| MW604760  | USA: Mesa, CO       | Cannabis sativa | 470    | partial          | Beet curly top virus | 16/06/21     | Chiginsky,J., Albrecht,T., Nachappa,P.                                                                       |
| MW604761  | USA: Pueblo, CO     | Cannabis sativa | 458    | partial          | Beet curly top virus | 16/06/21     | Chiginsky,J., Albrecht,T., Nachappa,P.                                                                       |
| MW604762  | USA: Rio Blanco, CO | Cannabis sativa | 446    | partial          | Beet curly top virus | 16/06/21     | Chiginsky,J., Albrecht,T., Nachappa,P.                                                                       |
| MW604763  | USA: Delta, CO      | Cannabis sativa | 458    | partial          | Beet curly top virus | 16/06/21     | Chiginsky,J., Albrecht,T., Nachappa,P.                                                                       |
| MW604764  | USA: Delta, CO      | Cannabis sativa | 410    | partial          | Beet curly top virus | 16/06/21     | Chiginsky,J., Albrecht,T., Nachappa,P.                                                                       |
| MW604765  | USA: Garfield, CO   | Cannabis sativa | 400    | partial          | Beet curly top virus | 16/06/21     | Chiginsky,J., Albrecht,T., Nachappa,P.                                                                       |
| MW604766  | USA: Larimer, CO    | Cannabis sativa | 479    | partial          | Beet curly top virus | 16/06/21     | Chiginsky,J., Albrecht,T., Nachappa,P.                                                                       |
| MW604767  | USA: Conejos, CO    | Cannabis sativa | 467    | partial          | Beet curly top virus | 16/06/21     | Chiginsky,J., Albrecht,T., Nachappa,P.                                                                       |
| MW604768  | USA: Montezuma, CO  | Cannabis sativa | 465    | partial          | Beet curly top virus | 16/06/21     | Chiginsky,J., Albrecht,T., Nachappa,P.                                                                       |
| MW604769  | USA: Rio Blanco, CO | Cannabis sativa | 477    | partial          | Beet curly top virus | 16/06/21     | Chiginsky,J., Albrecht,T., Nachappa,P.                                                                       |
| MW604770  | USA: Larimer, CO    | Cannabis sativa | 479    | partial          | Beet curly top virus | 16/06/21     | Chiginsky,J., Albrecht,T., Nachappa,P.                                                                       |
| MW604771  | USA: El Paso, CO    | Cannabis sativa | 478    | partial          | Beet curly top virus | 16/06/21     | Chiginsky,J., Albrecht,T., Nachappa,P.                                                                       |
| MW604772  | USA: Garfield, CO   | Cannabis sativa | 459    | partial          | Beet curly top virus | 16/06/21     | Chiginsky,J., Albrecht,T., Nachappa,P.                                                                       |
| MW604773  | USA: Montezuma, CO  | Cannabis sativa | 401    | partial          | Beet curly top virus | 16/06/21     | Chiginsky,J., Albrecht,T., Nachappa,P.                                                                       |
| MW604774  | USA: Montrose, CO   | Cannabis sativa | 468    | partial          | Beet curly top virus | 16/06/21     | Chiginsky,J., Albrecht,T., Nachappa,P.                                                                       |
| MW604775  | USA: El Paso, CO    | Cannabis sativa | 466    | partial          | Beet curly top virus | 16/06/21     | Chiginsky,J., Albrecht,T., Nachappa,P.                                                                       |
| MW604776  | USA: Montrose, CO   | Cannabis sativa | 480    | partial          | Beet curly top virus | 16/06/21     | Chiginsky,J., Albrecht,T., Nachappa,P.                                                                       |
| MW604777  | USA: Weld, CO       | Cannabis sativa | 411    | partial          | Beet curly top virus | 16/06/21     | Chiginsky,J., Albrecht,T., Nachappa,P.                                                                       |
| MW713376  | USA: Otero, CO      | Cannabis sativa | 457    | partial          | Beet curly top virus | 16/06/21     | Chiginsky,J., Nachappa,P.                                                                                    |
| MT878075  | USA: Rio Blanco,CO  | Cannabis sativa | 2732   | partial          | Beet curly top virus | 17/01/21     | Albrecht,T., Chiginsky,J., Nachappa,P., Stenglein,M.                                                         |

|          |                          |                 |      |          |                         |          |                                                                                                                                   |
|----------|--------------------------|-----------------|------|----------|-------------------------|----------|-----------------------------------------------------------------------------------------------------------------------------------|
| MT878076 | USA: Delta, CO           | Cannabis sativa | 1804 | partial  | Beet curly top virus    | 17/01/21 | Albrecht,T., Chiginsky,J., Nachappa,P., Stenglein,M.                                                                              |
| MT878077 | USA: Delta, CO           | Cannabis sativa | 968  | partial  | Beet curly top virus    | 17/01/21 | Albrecht,T., Chiginsky,J., Nachappa,P., Stenglein,M.                                                                              |
| MT878078 | USA: Conejos, CO         | Cannabis sativa | 1294 | partial  | Beet curly top virus    | 17/01/21 | Albrecht,T., Chiginsky,J., Nachappa,P., Stenglein,M.                                                                              |
| MT878079 | USA: Conejos, CO         | Cannabis sativa | 1483 | partial  | Beet curly top virus    | 17/01/21 | Albrecht,T., Chiginsky,J., Nachappa,P., Stenglein,M.                                                                              |
| MW182244 | USA                      | Cannabis sativa | 2929 | complete | Beet curly top virus    | 08/12/20 | Dickey,L., Masson,R., Hu,J.                                                                                                       |
| MK803280 | USA                      | Cannabis sativa | 2931 | complete | Beet curly top virus    | 27/10/19 | Giladi,Y., Hadad,L., Luria,N., Cranshaw,W., Dombrovsky,A.                                                                         |
| MK747245 | Israel                   | Cannabis sativa | 8672 | complete | Lettuce chlorosis virus | 10/09/19 | Hadad,L., Luria,N., Smith,E., Sela,N., Lachman,O., Dombrovsky,A.                                                                  |
| MK747246 | Israel                   | Cannabis sativa | 8601 | complete | Lettuce chlorosis virus | 10/09/19 | Hadad,L., Luria,N., Smith,E., Sela,N., Lachman,O., Dombrovsky,A.                                                                  |
| OQ420426 | Canada: British Columbia | Cannabis sativa | 256  | partial  | Hop latent viroid       | 28/06/23 | Punja,Z.K., Ni,L.                                                                                                                 |
| OQ068390 | USA: WA                  | Cannabis sativa | 256  | complete | Hop latent viroid       | 28/02/23 | Jarugula,S., Wagstaff,C., Mitra,A., Crowder,D., Gang,D., Rayapati,N., Crowder,D.W., Gang,D.R., Rayapati,N.A.                      |
| MZ090889 | USA: Delta, CO           | Cannabis sativa | 236  | partial  | Hop latent viroid       | 15/01/22 | Chiginsky,J., Langemeier,K., MacWilliams,J., Albrecht,T., Cranshaw,W., Fulladolsa,A.C., Kapuscinski,M., Stenglein,M., Nachappa,P. |
| MZ090890 | USA: Boulder, CO         | Cannabis sativa | 256  | partial  | Hop latent viroid       | 15/01/22 | Chiginsky,J., Langemeier,K., MacWilliams,J., Albrecht,T., Cranshaw,W., Fulladolsa,A.C., Kapuscinski,M., Stenglein,M., Nachappa,P. |
| MZ686448 | USA                      | Cannabis sativa | 216  | partial  | Hop latent viroid       | 21/12/21 | Rivedal,H.M., Funke,C., Frost,K., Frost,K.E.                                                                                      |
| MK791745 | USA                      | Cannabis sativa | 237  | partial  | Hop latent viroid       | 10/11/19 | Bektas,A., Hardwick,K.M., Waterman,K., Kristof,J.                                                                                 |
| MK791746 | USA                      | Cannabis sativa | 239  | partial  | Hop latent viroid       | 10/11/19 | Bektas,A., Hardwick,K.M., Waterman,K., Kristof,J.                                                                                 |
| MK791747 | USA                      | Cannabis sativa | 213  | partial  | Hop latent viroid       | 10/11/19 | Bektas,A., Hardwick,K.M., Waterman,K., Kristof,J.                                                                                 |
| MK791748 | USA                      | Cannabis sativa | 205  | partial  | Hop latent viroid       | 10/11/19 | Bektas,A., Hardwick,K.M., Waterman,K., Kristof,J.                                                                                 |
| MK791749 | USA                      | Cannabis sativa | 211  | partial  | Hop latent viroid       | 10/11/19 | Bektas,A., Hardwick,K.M., Waterman,K., Kristof,J.                                                                                 |
| MK791750 | USA                      | Cannabis sativa | 212  | partial  | Hop latent viroid       | 10/11/19 | Bektas,A., Hardwick,K.M., Waterman,K., Kristof,J.                                                                                 |
| MK791751 | USA                      | Cannabis sativa | 256  | complete | Hop latent viroid       | 10/11/19 | Bektas,A., Hardwick,K.M., Waterman,K., Kristof,J.                                                                                 |
| MK795520 | USA                      | Cannabis sativa | 285  | complete | Hop latent viroid       | 09/11/19 | Bektas,A., Hardwick,K.M., Waterman,K., Kristof,J.                                                                                 |
| MK795521 | USA                      | Cannabis sativa | 205  | complete | Hop latent viroid       | 09/11/19 | Bektas,A., Hardwick,K.M., Waterman,K., Kristof,J.                                                                                 |
| MK795522 | USA                      | Cannabis sativa | 277  | complete | Hop latent viroid       | 09/11/19 | Bektas,A., Hardwick,K.M., Waterman,K., Kristof,J.                                                                                 |
| MK795523 | USA                      | Cannabis sativa | 277  | complete | Hop latent viroid       | 09/11/19 | Bektas,A., Hardwick,K.M., Waterman,K., Kristof,J.                                                                                 |
| MK795524 | USA                      | Cannabis sativa | 208  | complete | Hop latent viroid       | 09/11/19 | Bektas,A., Hardwick,K.M., Waterman,K., Kristof,J.                                                                                 |
| MK795525 | USA                      | Cannabis sativa | 210  | complete | Hop latent viroid       | 09/11/19 | Bektas,A., Hardwick,K.M., Waterman,K., Kristof,J.                                                                                 |

[illegible]

[illegible]

[illegible]

[illegible]

|          |                  |                               |      |          |                                                                                              |                |                                                                                                                                   |
|----------|------------------|-------------------------------|------|----------|----------------------------------------------------------------------------------------------|----------------|-----------------------------------------------------------------------------------------------------------------------------------|
| MK795638 | USA              | Cannabis sativa               | 226  | complete | Hop latent viroid                                                                            | 09/11/19       | Bektas,A., Hardwick,K.M., Waterman,K., Kristof,J.                                                                                 |
| MK795639 | USA              | Cannabis sativa               | 247  | complete | Hop latent viroid                                                                            | 09/11/19       | Bektas,A., Hardwick,K.M., Waterman,K., Kristof,J.                                                                                 |
| MK795640 | USA              | Cannabis sativa               | 222  | complete | Hop latent viroid                                                                            | 09/11/19       | Bektas,A., Hardwick,K.M., Waterman,K., Kristof,J.                                                                                 |
| MK795641 | USA              | Cannabis sativa               | 228  | complete | Hop latent viroid                                                                            | 09/11/19       | Bektas,A., Hardwick,K.M., Waterman,K., Kristof,J.                                                                                 |
| MK795642 | USA              | Cannabis sativa               | 206  | complete | Hop latent viroid                                                                            | 09/11/19       | Bektas,A., Hardwick,K.M., Waterman,K., Kristof,J.                                                                                 |
| MK795643 | USA              | Cannabis sativa               | 226  | complete | Hop latent viroid                                                                            | 09/11/19       | Bektas,A., Hardwick,K.M., Waterman,K., Kristof,J.                                                                                 |
| MK795644 | USA              | Cannabis sativa               | 226  | complete | Hop latent viroid                                                                            | 09/11/19       | Bektas,A., Hardwick,K.M., Waterman,K., Kristof,J.                                                                                 |
| MK774671 | USA: California  | Cannabis sativa               | 256  | complete | Hop latent viroid                                                                            | 10/06/19       | Warren,J.G., Mercado,J., Grace,D.                                                                                                 |
| MH539703 | China            | Cannabis sativa subsp. sativa | 657  | partial  | Cucumber mosaic virus                                                                        | 16/03/20       | Yang,L., Zhao,M.                                                                                                                  |
| MW888422 | USA: Larimer, CO | Cannabis sativa               | 2511 | partial  | Grapevine line pattern virus<br>Grapevine line pattern virus<br>Grapevine line pattern virus | 15/01/22       | Chiginsky,J., Langemeier,K., MacWilliams,J., Albrecht,T., Cranshaw,W., Fulladolsa,A.C., Kapuscinski,M., Stenglein,M., Nachappa,P. |
| MW888423 | USA: Larimer, CO | Cannabis sativa               | 2374 | partial  |                                                                                              | 15/01/22       | Chiginsky,J., Langemeier,K., MacWilliams,J., Albrecht,T., Cranshaw,W., Fulladolsa,A.C., Kapuscinski,M., Stenglein,M., Nachappa,P. |
| MW888424 | USA: Larimer, CO | Cannabis sativa               | 3136 | partial  |                                                                                              | 15/01/22       | Chiginsky,J., Langemeier,K., MacWilliams,J., Albrecht,T., Cranshaw,W., Fulladolsa,A.C., Kapuscinski,M., Stenglein,M., Nachappa,P. |
| MT893737 | USA: Colorado    | Cannabis sativa               | 2173 | partial  | Tobacco streak virus                                                                         | 03/03/21       | Albrecht,T., Chiginsky,J., Nachappa,P., Stenglein,M.                                                                              |
| MT893738 | USA: Colorado    | Cannabis sativa               | 2851 | partial  | Tobacco streak virus                                                                         | 03/03/21       | Albrecht,T., Chiginsky,J., Nachappa,P., Stenglein,M.                                                                              |
| MT893739 | USA: Colorado    | Cannabis sativa               | 3420 | partial  | Tobacco streak virus                                                                         | 03/03/21       | Albrecht,T., Chiginsky,J., Nachappa,P., Stenglein,M.                                                                              |
| MT893742 | USA: Colorado    | Cannabis sativa               | 455  | partial  | Cannabis cryptic virus                                                                       | 03/03/21 00:00 | Albrecht,T., Chiginsky,J., Nachappa,P., Stenglein,M.                                                                              |
| MT893743 | USA: Colorado    | Cannabis sativa               | 2322 | partial  | Cannabis cryptic virus                                                                       | 03/03/21 00:00 | Albrecht,T., Chiginsky,J., Nachappa,P., Stenglein,M.                                                                              |
| KX709964 | Italy            | Cannabis sativa               | 2397 | partial  | Cannabis cryptic virus                                                                       | 17/09/16 00:00 | Menzel,W., Righetti,L., Paris,R., Ratti,C., Onofri,C., Calzolari,D., Knierim,D., Magagnini,G., Pacifico,D., Grassi,G.             |
| KX709965 | Italy            | Cannabis sativa               | 2266 | partial  | Cannabis cryptic virus                                                                       | 17/09/16 00:00 | Menzel,W., Righetti,L., Paris,R., Ratti,C., Onofri,C., Calzolari,D., Knierim,D., Magagnini,G., Pacifico,D., Grassi,G.             |
| JN196536 | Germany          | Cannabis sativa               | 2420 | partial  | Cannabis cryptic virus                                                                       | 21/11/11 00:00 | Ziegler,A., Matousek,J., Steger,G., Schubert,J.                                                                                   |
| JN196537 | Germany          | Cannabis sativa               | 2290 | partial  | Cannabis cryptic virus                                                                       | 21/11/11 00:00 | Ziegler,A., Matousek,J., Steger,G., Schubert,J.                                                                                   |
| MT909562 | USA: Colorado    | Cannabis sativa               | 2913 | partial  | Opuntia umbra-like virus                                                                     | 17/01/21 00:00 | Albrecht,T., Chiginsky,J., Nachappa,P., Stenglein,M.                                                                              |

|          |                          |                 |      |         |                                     |                |                                                                                                              |
|----------|--------------------------|-----------------|------|---------|-------------------------------------|----------------|--------------------------------------------------------------------------------------------------------------|
| MT909563 | USA: Colorado            | Cannabis sativa | 2988 | partial | Opuntia umbra-like virus            | 17/01/21 00:00 | Albrecht,T., Chiginsky,J., Nachappa,P., Stenglein,M.                                                         |
| OQ068388 | USA: WA                  | Cannabis sativa | 2876 | partial | Citrus yellow vein-associated virus | 28/02/23 00:00 | Jarugula,S., Wagstaff,C., Mitra,A., Crowder,D., Gang,D., Rayapati,N., Crowder,D.W., Gang,D.R., Rayapati,N.A. |
| OQ068389 | USA: WA                  | Cannabis sativa | 1399 | partial | Citrus yellow vein-associated virus | 28/02/23 00:00 | Jarugula,S., Wagstaff,C., Mitra,A., Crowder,D., Gang,D., Rayapati,N., Crowder,D.W., Gang,D.R., Rayapati,N.A. |
| MT893740 | USA: Colorado            | Cannabis sativa | 2932 | partial | Citrus yellow vein-associated virus | 03/03/21 00:00 | Albrecht,T., Chiginsky,J., Nachappa,P., Stenglein,M.                                                         |
| MT893741 | USA: Colorado            | Cannabis sativa | 2854 | partial | Citrus yellow vein-associated virus | 03/03/21 00:00 | Albrecht,T., Chiginsky,J., Nachappa,P., Stenglein,M.                                                         |
| OQ420425 | Canada: British Columbia | Cannabis sativa | 2825 | partial | Cannabis sativa mitovirus 1         | 28/06/23 00:00 | Punja,Z.K., Ni,L.                                                                                            |
| MT878080 | USA: Rio Blanco, CO      | Cannabis sativa | 2818 | partial | Cannabis sativa mitovirus 1         | 17/01/21 00:00 | Albrecht,T., Chiginsky,J., Nachappa,P., Stenglein,M.                                                         |
| MT878081 | USA: Delta, CO           | Cannabis sativa | 2815 | partial | Cannabis sativa mitovirus 1         | 17/01/21 00:00 | Albrecht,T., Chiginsky,J., Nachappa,P., Stenglein,M.                                                         |
| MT878082 | USA: Conejos, CO         | Cannabis sativa | 2819 | partial | Cannabis sativa mitovirus 1         | 17/01/21 00:00 | Albrecht,T., Chiginsky,J., Nachappa,P., Stenglein,M.                                                         |
| MT878083 | USA: Boulder, CO         | Cannabis sativa | 2817 | partial | Cannabis sativa mitovirus 1         | 17/01/21 00:00 | Albrecht,T., Chiginsky,J., Nachappa,P., Stenglein,M.                                                         |
| MT878084 | USA: Boulder, CO         | Cannabis sativa | 2821 | partial | Cannabis sativa mitovirus 1         | 17/01/21 00:00 | Albrecht,T., Chiginsky,J., Nachappa,P., Stenglein,M.                                                         |
| BK010428 |                          | Cannabis sativa | 2857 | partial | Cannabis sativa mitovirus 1         | 11/07/18 00:00 | Nibert,M.L., Vong,M., Fugate,K.K., Debat,H.J.                                                                |
| BK010436 |                          | Cannabis sativa | 2824 | partial | Cannabis sativa mitovirus 1         | 11/07/18 00:00 | Nibert,M.L., Vong,M., Fugate,K.K., Debat,H.J.                                                                |
| BK010437 |                          | Cannabis sativa | 2825 | partial | Cannabis sativa mitovirus 1         | 11/07/18 00:00 | Nibert,M.L., Vong,M., Fugate,K.K., Debat,H.J.                                                                |
| BK010438 |                          | Cannabis sativa | 2805 | partial | Cannabis sativa mitovirus 1         | 11/07/18 00:00 | Nibert,M.L., Vong,M., Fugate,K.K., Debat,H.J.                                                                |

Table S1: NCBI accession number of viruses and viroids that have been detected and sequenced in *Cannabis sativa* L., general information such as, genome length, completeness of the sequence, date, and the submitters are presented.
